# Supplementary material for: Reconstructed Global Invasion and Spatio-Temporal Distribution Pattern Dynamics of Sorghum halepense under Climate and Land-Use Change
Source: MDPI journal article supplement (doi:10.3390/plants12173128), 2023-08-31
Supplement: s1 [file s1]

## Supplemental materials

### Supplemental figure

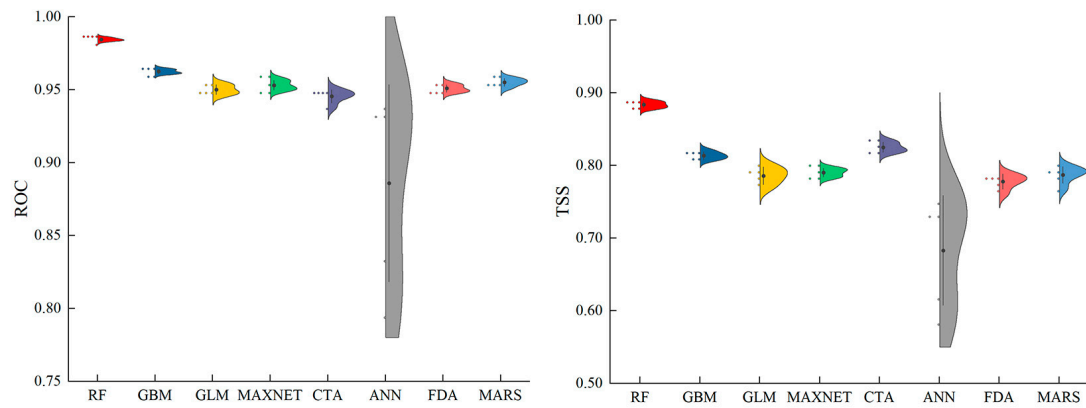

**Figure S1.** Single model performance with ROC and TSS values.

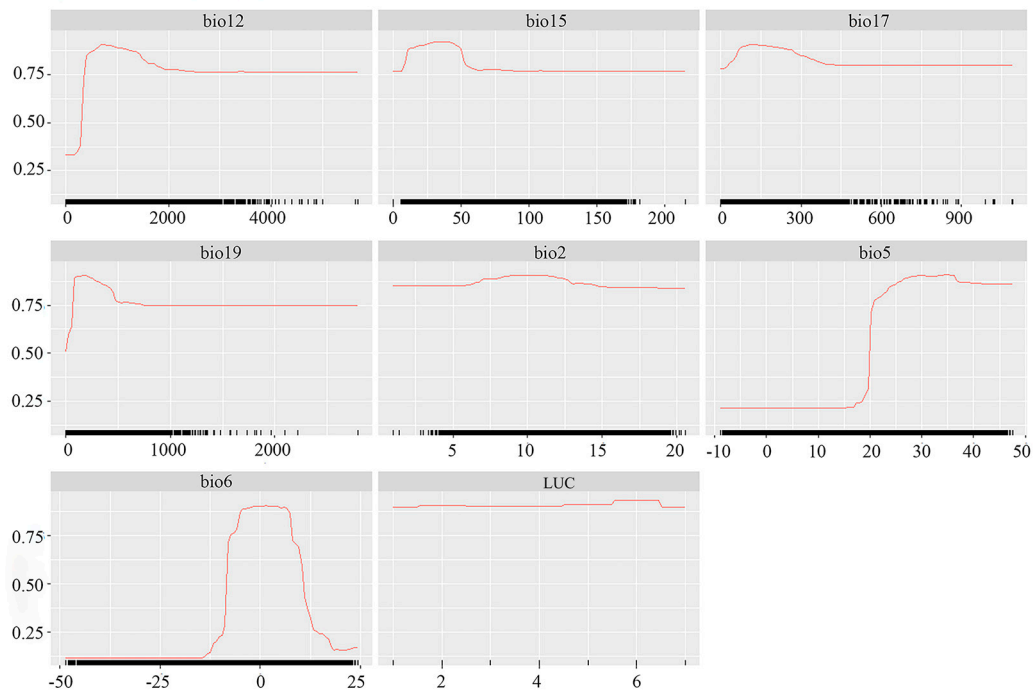

**Figure S2.** Significant environmental variables to predict the potential global suitable habitats (PGSH) of *Sorghum halepense*.

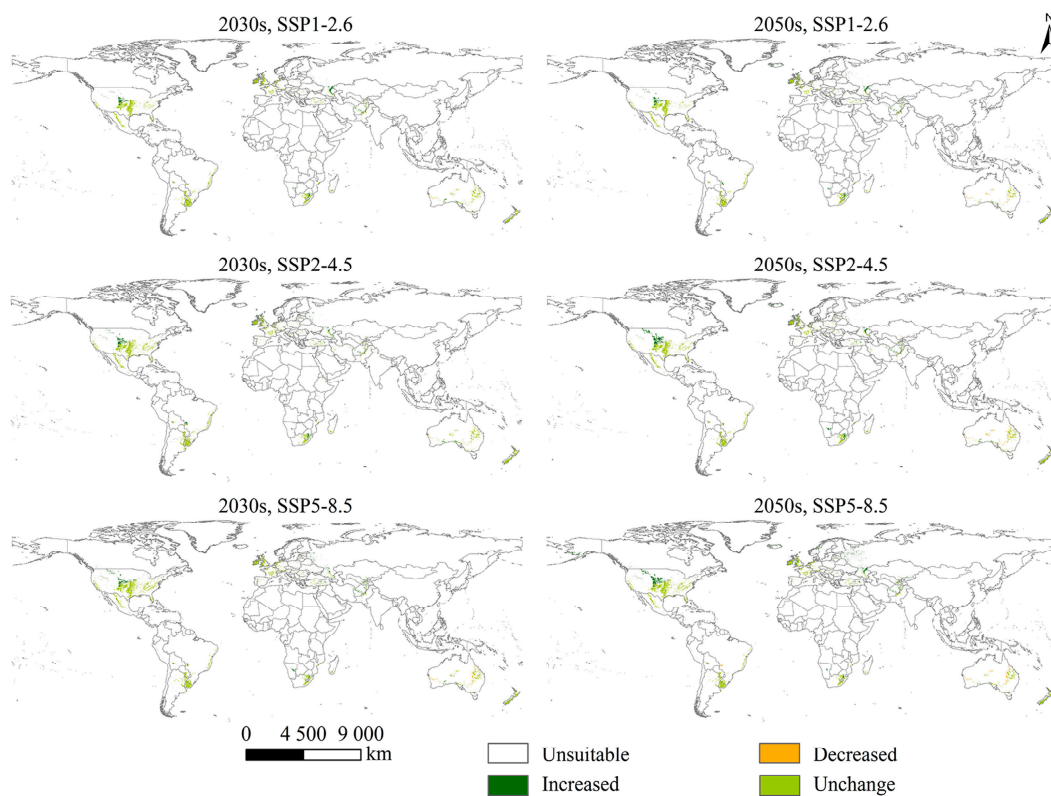

**Figure S3.** Changes in suitable grassland area for *Sorghum halepense* from different future scenarios (SSP1-2.6, SSP2-4.5, and SSP5-8.5) in the 2030s and 2050s to the near current climate.

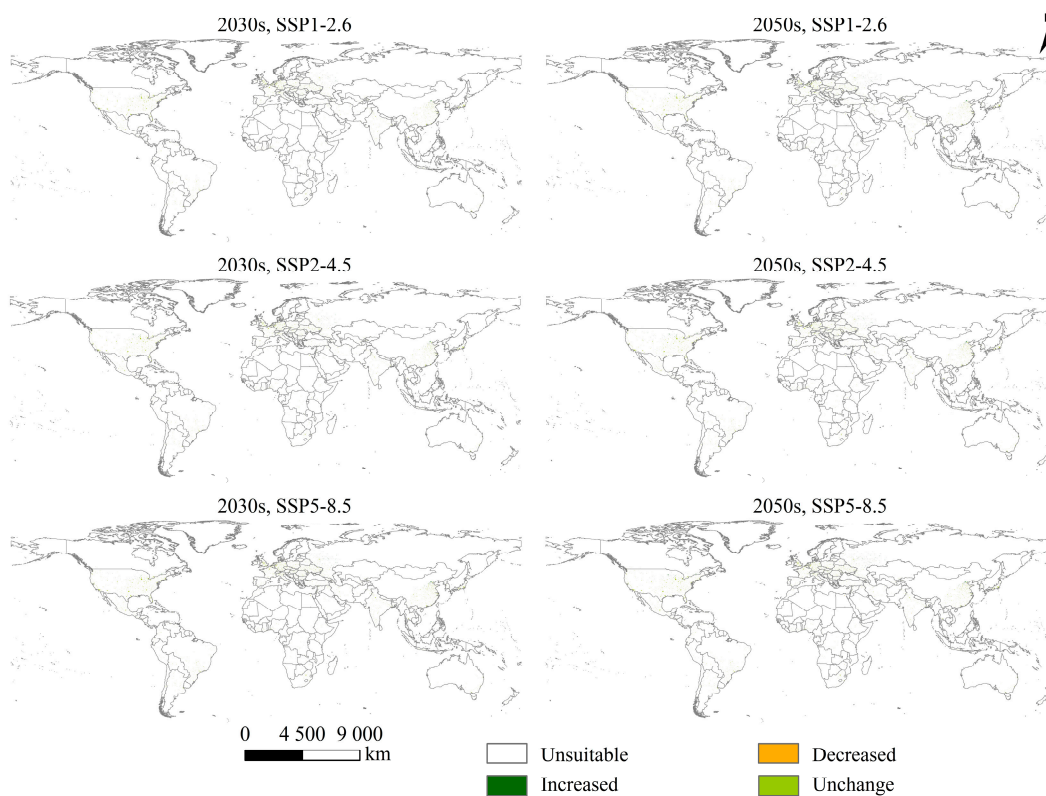

**Figure S4.** Changes in suitable urban area for *Sorghum halepense* from different future scenarios

(SSP1-2.6, SSP2-4.5, and SSP5-8.5) in the 2030s and 2050s to the near current climate.

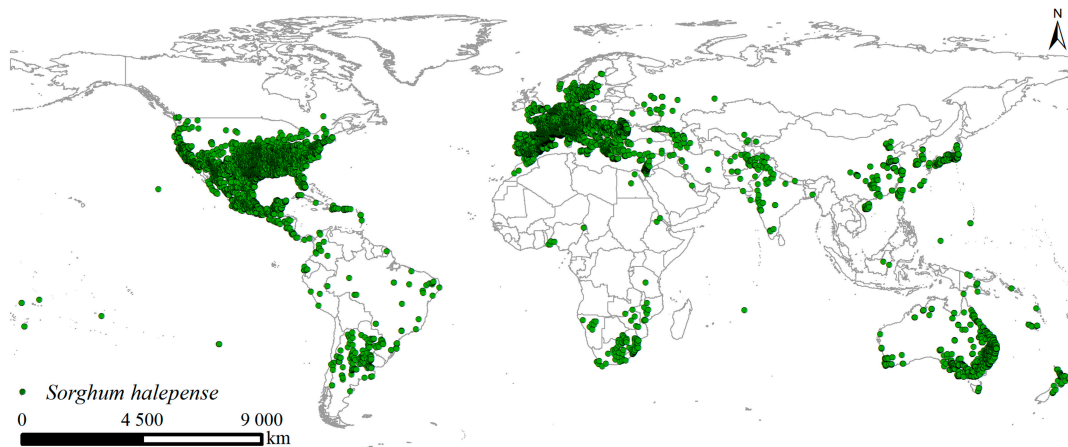

**Figure S5.** Global distribution occurrences of *Sorghum halepense*.

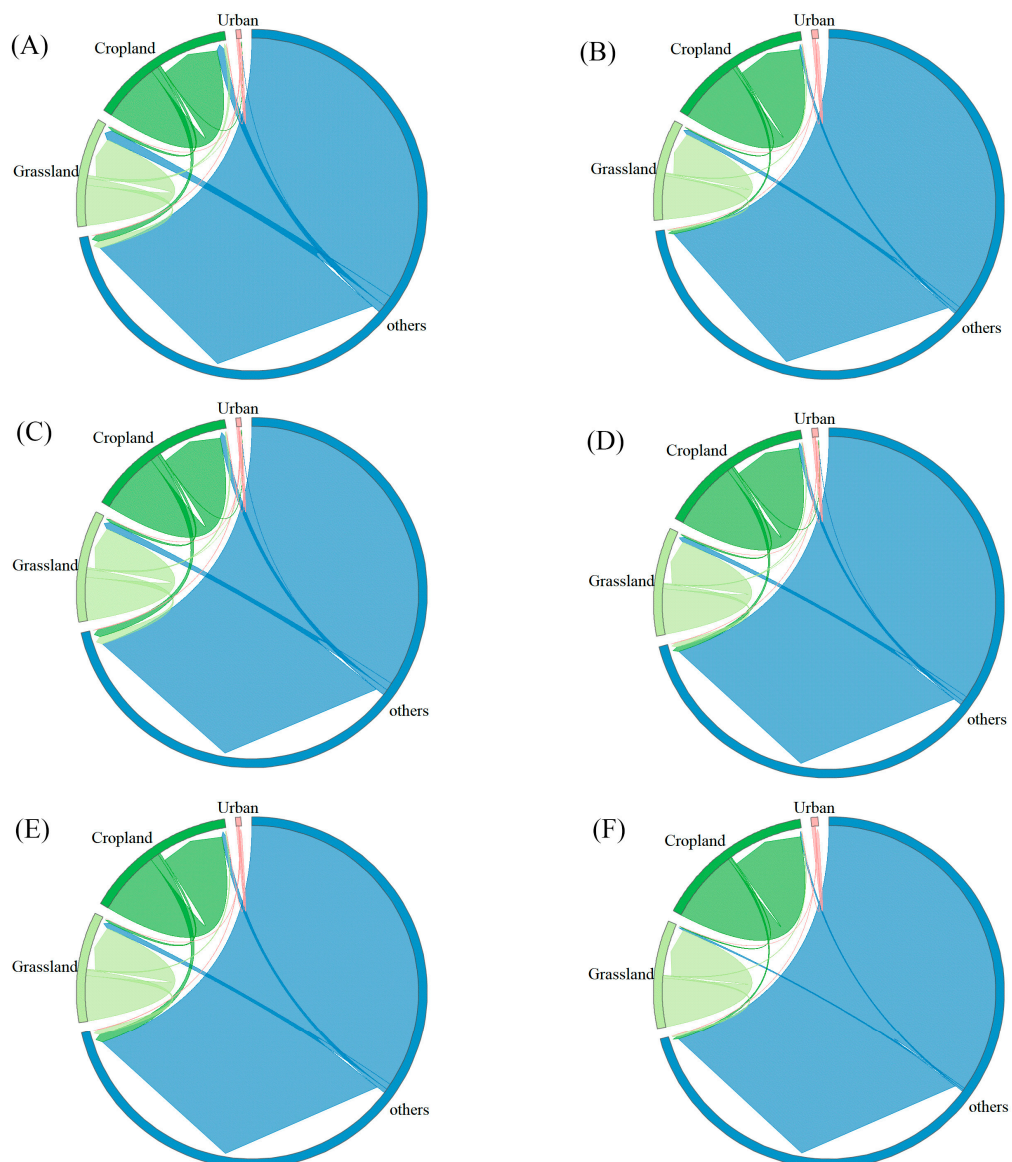

**Figure S6.** Global land-use transitions by future scenarios. Each arrow represents from a specific land-use type to other land-use type. (A) the transitions from under SSP1-2.6 in the 2030s to the near current climate, (B) the transitions from under SSP1-2.6 in the 2050s to the SSP1-2.6 in the 2030s, (C) the transitions from under SSP2-4.5 in the 2030s to the near current climate, (D) the transitions from under SSP2-4.5 in the 2050s to the SSP2-4.5 in the 2030s, (E) the transitions from under SSP5-8.5 in the 2030s to the near current climate, (F) the transitions from under SSP5-8.5 in the 2050s to the SSP5-8.5 in the 2030s.

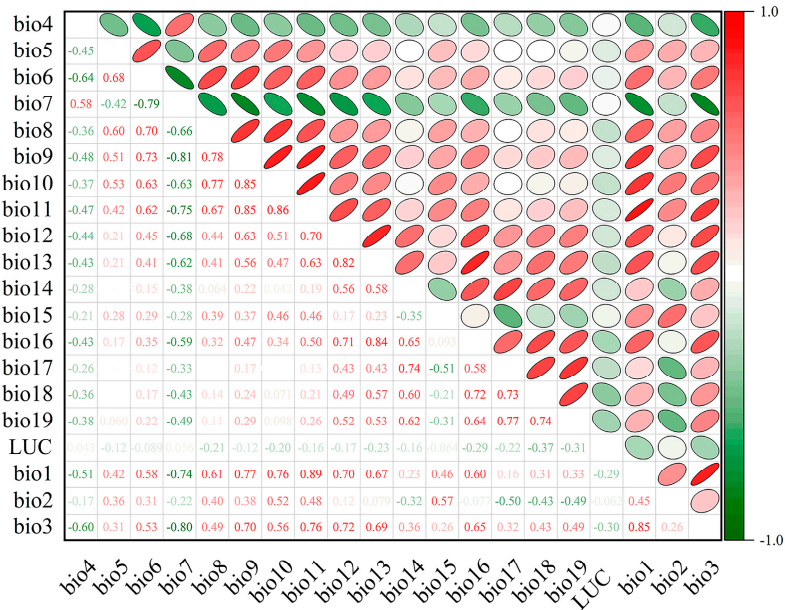

**Figure S7.** Correlation of twenty environmental variables via ENMTools.

**Supplemental table**

**Table S1** The mean ROC, TSS, and KAPPA values of eight single model and EM.

| model  | mean ROC | mean TSS | mean KAPPA |
|--------|----------|----------|------------|
| ANN    | 0.885    | 0.666    | 0.685      |
| CTA    | 0.943    | 0.818    | 0.810      |
| FDA    | 0.948    | 0.773    | 0.768      |
| GBM    | 0.960    | 0.809    | 0.808      |
| GLM    | 0.947    | 0.775    | 0.777      |
| MARS   | 0.952    | 0.778    | 0.782      |
| MaxEnT | 0.951    | 0.785    | 0.778      |
| RF     | 0.983    | 0.880    | 0.880      |
| EM     | 0.984    | 0.851    | 0.856      |

**Table S2** Environmental variables projected to predict the potential global suitable habitats (PGSH) of *Sorghum halepense*.

| Variable | Description                                             | Unit |
|----------|---------------------------------------------------------|------|
| bio1     | Annual mean temperature                                 | °C   |
| bio2     | Mean diurnal range (Mean of monthly (max temp-min temp) | °C   |

|       |                                                      |    |
|-------|------------------------------------------------------|----|
| bio3  | Isothermality (Bio2/Bio7)×100                        | -  |
| bio4  | Temperature seasonality (standard deviation×100)     | °C |
| bio5  | Max temperature of warmest month                     | °C |
| bio6  | Min temperature of coldest month                     | °C |
| bio7  | Temperature annual range (bio5-bio6)                 | °C |
| bio8  | Mean temperature of wettest quarter                  | °C |
| bio9  | Mean temperature of driest quarter                   | °C |
| bio10 | Mean temperature of warmest quarter                  | °C |
| bio11 | Mean temperature of coldest quarter                  | °C |
| bio12 | Annual precipitation                                 | mm |
| bio13 | Precipitation of wettest month                       | mm |
| bio14 | precipitation of driest month                        | mm |
| bio15 | Precipitation seasonality (coefficient of variation) | -  |
| bio16 | Precipitation of wettest quarter                     | mm |
| bio17 | Precipitation of driest quarter                      | mm |
| bio18 | Precipitation of warmest quarter                     | mm |
| bio19 | Precipitation of coldest quarter                     | mm |
| LUC   | Land use change                                      |    |

---
