# Supplementary material for: Reconstructed Global Invasion and Spatio-Temporal Distribution Pattern Dynamics of Sorghum halepense under Climate and Land-Use Change
Source: Plants (Basel). 2023 Aug 31;12(17):3128. doi: 10.3390/plants12173128 (PMC10489930; doi:10.3390/plants12173128)
Supplement: Supplementary file 1 [file plants-12-03128-s001.zip › Excel S1.xlsx]

## Sheet: Sheet1
Excel S1 Countries historically invaded by Sorghum halepense
Species	Continent	Country	Source	Origin	Time	Time Source
S. halepense	Europe	Germany	Weed control in glyphosate-tolerant maize in Europe		1750	GBIF
S. halepense	Europe	Bulgaria	CABI, EPPO	Introduced	1805	GBIF
S. halepense	Asia	Nepal	CABI	Introduced	1805	Missouri Botanical Garden （https://tropicos.org/name/Search?name=Sorghum%20halepense）
S. halepense	Asia	Turkey	CABI	Native	1827	GBIF
S. halepense	Europe	Italy	CABI, EPPO	Introduced	1832	GBIF
S. halepense	Africa	South Africa	CABI, EPPO	Introduced	1839	GBIF
S. halepense	Asia	Iraq	CABI, EPPO	Native	1841	GBIF
S. halepense	Asia	Syria	CABI	Native	1841	GBIF
S. halepense	Europe	Romania	CABI, EPPO	Introduced	1845	GBIF
S. halepense	Europe	Spain	CABI, EPPO	Introduced	1848	GBIF
S. halepense	Asia	Lebanon	CABI, EPPO	Native	1852	GBIF
S. halepense	Europe	Slovakia	CABI	Introduced	1853	GBIF
S. halepense	Europe	Croatia	CABI		1859	GBIF
S. halepense	Europe	France	CABI	Introduced	1868	GBIF
S. halepense	Oceania	Australia	CABI, EPPO		1871	GBIF
S. halepense	Europe	Austria	CABI, EPPO	Introduced	1871	Spread dynamics and agricultural impact of Sorghum halepense, an emerging invasive species in Central Europe: Spread dynamics and impact of Sorghum halepense.
S. halepense	Europe	Bosnia and Herzegovina	CABI	Introduced	1880	GBIF
S. halepense	Europe	Portugal	CABI, EPPO	Introduced	1880	Exotic naturalized flora of continental Portugal-A reassessment.
S. halepense	Europe	Greece	CABI, EPPO		1883	GBIF
S. halepense	Oceania	Samoa	CABI	Introduced	1895	GBIF
S. halepense	South America	Argentina	CABI, EPPO	Introduced	1800s	Eco-biology, impact, and management of Sorghum halepense (L.) Pers.
S. halepense	North America	United States	CABI, EPPO		Early 1800s	CABI
S. halepense	Africa	Egypt	CABI	Native	2200BC	Johnson grass, Sorghum halepense
S. halepense	Africa	Eswatini	CABI	Introduced	1896	A catalogue of problem plants in southern Africa incorporating the national weed list of South Africa.
S. halepense	North America	Cuba	CABI, EPPO	Introduced	1900	GBIF
S. halepense	Europe	Slovenia	Weed control in glyphosate-tolerant maize in Europe		1900	GBIF
S. halepense	Asia	Japan	CABI	Introduced	1901	GBIF
S. halepense	Europe	Switzerland	CABI	Introduced	1901	GBIF
S. halepense	Asia	Israel	CABI, EPPO	Native	1906	GBIF
S. halepense	North America	Jamaica	CABI, EPPO	Introduced	1906	GBIF
S. halepense	North America	Dominican Republic	CABI, EPPO	Introduced	1911	GBIF
S. halepense	North America	Nicaragua	CABI, EPPO	Introduced	1911	GBIF
S. halepense	Europe	Denmark	CABI, EPPO	Introduced	1914	GBIF
S. halepense	Europe	Montenegro	GBIF		1915	GBIF	no detailed longitude and latitude
S. halepense	Europe	Albania	CABI	Introduced	1920	GBIF
S. halepense	Europe	Norway	CABI	Introduced	1920	GBIF
S. halepense	Asia	China	CABI, EPPO		1921	Plant-soil feedback of the invasive Sorghum halepense on Hainan island, China
S. halepense	Europe	Belgium	CABI, EPPO		1923	GBIF
S. halepense	Africa	Morocco	CABI, EPPO	Introduced	1924	GBIF
S. halepense	Africa	Namibia	CABI, EPPO	Introduced	1925	GBIF
S. halepense	Europe	Czechia	CABI	Introduced	1927	GBIF
S. halepense	Europe	United Kingdom	CABI	Introduced	1927	GBIF
S. halepense	Asia	Azerbaijan	CABI	Native	1930	GBIF
S. halepense	Africa	Mozambique	CABI, EPPO	Introduced	1942	GBIF
S. halepense	Europe	Ireland	CABI	Introduced	1943	GBIF
S. halepense	Europe	Latvia	CABI	Introduced	1944	GBIF	no detailed longitude and latitude
S. halepense	Oceania	New Zealand	CABI, EPPO, GBIF	Introduced	1945	GBIF
S. halepense	Europe	Sweden	CABI	Introduced	1945	GBIF
S. halepense	North America	Honduras	CABI, EPPO	Introduced	1947	GBIF
S. halepense	Oceania	Tonga	CABI	Introduced	1951	GBIF
S. halepense	North America	El Salvador	CABI, EPPO		1952	GBIF
S. halepense	Africa	Zimbabwe	CABI	Introduced	1952	GBIF
S. halepense	Asia	British Indian Ocean Territory	CABI		1954	Ephelis on Sorghum halepense in Mysore
S. halepense	Asia	India	CABI, EPPO	Native	1954	Ephelis on Sorghum halepense in Mysore
S. halepense	Asia	Iran	CABI, EPPO	Native	1958	GBIF
S. halepense	Oceania	Papua New Guinea	CABI	Introduced	1958	GBIF
S. halepense	North America	Canada	CABI		1959	GBIF
S. halepense	Europe	Hungary	CABI, EPPO	Introduced	mid-1960s	Arable weeds of Hungary. The 5th National Weed Survey (2007–2008). Ministry of Agriculture and Rural Development, Budapest, Hungary
S. halepense	Asia	Afghanistan	CABI, EPPO	Native	1960	GBIF
S. halepense	Africa	Malawi	CABI, EPPO		1960	GBIF
S. halepense	Africa	Nigeria	CABI, EPPO		1960	GBIF
S. halepense	Oceania	Guam	CABI	Introduced	1963	GBIF
S. halepense	North America	Costa Rica	CABI	Introduced	1966	GBIF
S. halepense	Oceania	Northern Mariana Islands	CABI	Introduced	1966	GBIF
S. halepense	North America	Belize	CABI	Introduced	1967	GBIF
S. halepense	South America	Bolivia	CABI, EPPO	Introduced	1967	GBIF
S. halepense	Oceania	Cook Islands	CABI	Introduced	1969	GBIF	no detailed longitude and latitude
S. halepense	North America	Panama	CABI	Introduced	1969	GBIF
S. halepense	North America	Guatemala	CABI, EPPO	Introduced	1970	GBIF
S. halepense	Europe	Serbia	CABI, EPPO		1971	GBIF
S. halepense	Africa	Senegal	CABI	Introduced	1972	CABI, Undated. Compendium record.	no detailed longitude and latitude
S. halepense	Asia	Uzbekistan	CABI	Native	1972	GBIF
S. halepense	Europe	Moldova			1973	GBIF	no recorded literature
S. halepense	Asia	Indonesia	CABI, EPPO	Introduced	1975	GBIF
S. halepense	Europe	North Macedonia			1977	GBIF	no recorded literature
S. halepense	Europe	Netherlands	CABI	Introduced	1978	GBIF
S. halepense	North America	Puerto Rico	CABI, EPPO	Introduced	1979	GBIF
S. halepense	Europe	Czechoslovakia	CABI	Introduced	1980	Sorghum Moench.	no detailed longitude and latitude
S. halepense	Oceania	New Caledonia	CABI	Introduced	1981	GBIF
S. halepense	Africa	Benin	CABI, GBIF		1982	GBIF
S. halepense	Oceania	Wallis and Futuna	CABI	Introduced	1982	GBIF
S. halepense	Asia	Bahrain	CABI	Native	1983	Weeds of Central, Southern and Eastern Arabian Peninsula
S. halepense	South America	Colombia	CABI, EPPO	Introduced	1983	GBIF
S. halepense	Asia	Oman	CABI	Native	1983	Weeds of Central, Southern and Eastern Arabian Peninsula	no detailed longitude and latitude
S. halepense	Asia	Saudi Arabia	CABI	Native	1983	Weeds of Central, Southern and Eastern Arabian Peninsula	no detailed longitude and latitude
S. halepense	South America	Ecuador	CABI, GBIF	Introduced	1985	GBIF
S. halepense	South America	Paraguay	CABI	Introduced	1985	GBIF
S. halepense	South America	Peru	CABI	Introduced	1986	GBIF
S. halepense	South America	French Guiana	CABI	Introduced	1987	GBIF
S. halepense	Europe	Belarus	CABI	Introduced	1988	CABI, Undated. Compendium record.	no detailed longitude and latitude
S. halepense	Europe	Lithuania	CABI	Introduced	1988	GBIF	no detailed longitude and latitude
S. halepense	Asia	Pakistan	CABI, EPPO	Native	1989	GBIF
S. halepense	Europe	Poland	CABI, EPPO	Introduced	1989	GBIF
S. halepense	Europe	Russia	CABI, EPPO		1990	GBIF
S. halepense	Oceania	Pitcairn	CABI	Introduced	1991	GBIF
S. halepense	South America	Venezuela	CABI, EPPO	Introduced	1991	GBIF	no detailed longitude and latitude
S. halepense	Oceania	Fiji	CABI, EPPO	Introduced	1992	EPPO	no detailed longitude and latitude
S. halepense	North America	Mexico	CABI, EPPO, GBIF	Introduced	1992	EPPO
S. halepense	Asia	Philippines	CABI, EPPO	Introduced	1992	EPPO	no detailed longitude and latitude
S. halepense	Asia	Sri Lanka	CABI, EPPO	Introduced	1992	EPPO	no detailed longitude and latitude
S. halepense	Africa	Tanzania	CABI, EPPO	Introduced	1992	EPPO
S. halepense	Asia	Thailand	CABI, EPPO	Introduced	1992	EPPO	no detailed longitude and latitude
S. halepense	Asia	Bangladesh	CABI		1996	CABI, Undated. Compendium record.
S. halepense	Oceania	Vanuatu	CABI	Introduced	1997	GBIF
S. halepense	South America	Chile	CABI, EPPO, GBIF	Introduced	1998	Feeding by the aphid Sipha flava produces a reddish spot on leaves of Sorghum halepense: an induced defense?
S. halepense	Asia	Armenia	CABI	Native	2003	GBIF
S. halepense	Europe	Finland			2003	GBIF	no recorded literature
S. halepense	South America	Uruguay	CABI, EPPO	Introduced	2005	Dealing with the evolution and spread of Sorghum halepense glyphosate resistance in Argentina
S. halepense	South America	Brazil	CABI, EPPO	Introduced	2006	Toxic plants for livestock in the western and eastern Serido, state of Rio Grande do Norte, in the Brazilian semiarid
S. halepense	Asia	Tajikistan	CABI	Introduced	2007	GBIF
S. halepense	Oceania	Federated States of Micronesia	CABI	Introduced	2008	Pacific Islands Ecosystems at Risk.	no detailed longitude and latitude
S. halepense	Oceania	Marshall Islands	CABI	Introduced	2008	Pacific Islands Ecosystems at Risk.	no detailed longitude and latitude
S. halepense	Oceania	Palau	CABI	Introduced	2008	GBIF
S. halepense	Oceania	Solomon Islands	CABI	Introduced	2008	Pacific Islands Ecosystems at Risk.
S. halepense	Asia	South Korea	CABI	Introduced	2011	GBIF
S. halepense	Asia	Kazakhstan	CABI, GBIF	Native	2012	Germplasm Resources Information Network - (GRIN).
S. halepense	Africa	Libya	CABI	Native	2012	Germplasm Resources Information Network - (GRIN).	no detailed longitude and latitude
S. halepense	Asia	Turkmenistan	CABI	Native	2012	Germplasm Resources Information Network - (GRIN).
S. halepense	Asia	Jordan	CABI, EPPO	Native	2013	EPPO
S. halepense	Africa	Ethiopia	CABI		2015	First report of Maize chlorotic mottle virus and maize lethal necrosis on maize in Ethiopia.
S. halepense	Asia	Kyrgyzstan	CABI	Native	2016	GBIF
S. halepense	Europe	Ukraine	CABI, EPPO		2019	EPPO
S. halepense	Oceania	French Polynesia	CABI	Introduced	2022	GBIF
S. halepense	Europe	Serbia and montenergro	CABI				no detailed longitude and latitude
Dewar AM (2009) Weed control in glyphosate-tolerant maize in Europe. Pest Manag Sci 65:1047-1058. https://doi.org/10.1002/ps.1806.
Missouri Botanical Garden （https://tropicos.org/name/Search?name=Sorghum%20halepense）
FOLLAK S and ESSL F (2013) Spread dynamics and agricultural impact of Sorghum halepense, an emerging invasive species in Central Europe. Weed Research 53:53-60. https://doi.org/10.1111/j.1365-3180.2012.00952.x.
de Almeida J, Freitas H (2006). Exotic naturalized flora of continental Portugal-A reassessment. Botanica Complutensis 30.
Peerzada AM, Ali HH, Hanif Z, Bajwa AA, Kebaso L, Frimpong D, Iqbal N, Namubiru H, Hashim S, Rasool G, Manalil S, van der Meulen A, Chauhan BS (2023) Eco-biology, impact, and management of Sorghum halepense (L.) Pers.. Biol Invasions 25:955–973. https://doi.org/10.1007/s10530-017-1410-8
Weber RW (2004) Johnson grass, Sorghum halepense. Ann Allergy Asthma Immunol 93:A6. https://doi.org/10.1016/s1081-1206(10)61441-x.
Cowling RM (2004) A catalogue of problem plants in southern Africa incorporating the national weed list of South Africa. Cambridge University Press.
Wang Y, Wang W, Huang H, Liu Y, Li X, Huang Q (2022) Plant-soil feedback of the invasive Sorghum halepense on Hainan island, China. Biol Invasions 24:1527–1537. https://doi.org/10.1007/s10530-022-02736-3
Novák R, Dancza I, Szentey L, Karamán J (2009) Arable weeds of Hungary. The 5th National Weed Survey (2007–2008). Ministry of Agriculture and Rural Development, Budapest, Hungary
Chaudhary SA, Parker C, Kasasian L (1981) Weeds of Central, Southern and Eastern Arabian Peninsula, Tropical Pest Management 27:181-190. https://doi.org/10.1080/09670878109413649.
Costa-Arbulú C, Gianoli E, Gonzáles WL, Niemeyer HM. Feeding by the aphid Sipha flava produces a reddish spot on leaves of Sorghum halepense: an induced defense? J Chem Ecol. 2001 Feb;27(2):273-83. doi: 10.1023/a:1005676321251.
Valverde B, Gressel J (2006) Dealing with the evolution and spread of Sorghum halepense glyphosate resistance in Argentina.
Silva D, Riet-Correa F, Medeiros R, Oliveira O (2006) Toxic plants for livestock in the western and eastern Serido, state of Rio Grande do Norte, in the Brazilian semiarid. Pesquisa Veterinária Brasileira 26:223-236.
Mahuku G,Wangai A,Sadessa K, Teklewold A, Wegary D, Ayalneh D, Adams I, Smith J, Bottomley E, Bryce S, Braidwood L, Feyissa B, Regassa B, Wanjala B, Kimunye JN, Mugambi C, Monjero K, Prasanna BM (2015) First report of maize chlorotic mottle virus and maize lethal necrosis on maize in Ethiopia. Plant Disease 99:1870-1870.
